# Huntington's disease-like phenotype due to trinucleotide repeat expansions in the *TBP* and *JPH3* genes

Giovanni Stevanin,<sup>1,2\*</sup> Hiroto Fujigasaki,<sup>1,8\*</sup> Anne-Sophie Lebre,<sup>1,2,3</sup> Agnès Camuzat,<sup>1,2</sup> Cécile Jeannequin,<sup>1</sup> Catherine Dodé,<sup>6</sup> Junko Takahashi,<sup>5,9</sup> Chankranira Sãn,<sup>6</sup> Robert Bellance,<sup>7</sup> Alexis Brice<sup>1,2,3,4</sup> and Alexandra Durr<sup>1,2,3,4</sup>

<sup>1</sup>INSERM U289, <sup>2</sup>Institut Fédératif des Neurosciences, <sup>3</sup>Département de Génétique, Cytogénétique et Embryologie, <sup>4</sup>Fédération de Neurologie and <sup>5</sup>INSERM U106, Groupe Hospitalier Pitié-Salpêtrière AP-HP, <sup>6</sup>Laboratoire de Biochimie et de Génétique Moléculaire, Groupe Hospitalier Cochin Port-Royal AP-HP, Paris, France and <sup>7</sup>Unité de Neuromyologie, Hôpital Pierre Zobda-Quitman, CHU de Fort-de-France, Martinique, French West Indies

<sup>8</sup>Present address: Department of Neurology and Neurological Science, Tokyo Medical and Dental University, Tokyo, Japan

<sup>9</sup>Present address: Division of Neuropathology, Jikei University School of Medicine, Minato-ku, Tokyo, Japan

## Summary

We report a group of 252 patients with a Huntington's disease-like (HDL) phenotype, including 60 with typical Huntington's disease, who had tested negative for pathological expansions in the *IT15* gene, the major mutation in Huntington's disease. They were screened for repeat expansions in two other genes involved in HDL phenotypes: those encoding the junctophilin-3 (*JPH3/HDL2*) and prion (*PRNP/HDL1*) proteins. In addition, because of the clinical overlap between patients with HDL disease and autosomal dominant cerebellar ataxia or dentatorubral and pallidolusian atrophy (DRPLA), we investigated trinucleotide repeat expansions in genes encoding the TATA-binding protein (*TBP/SCA17*) and atrophin-1 (*DRPLA*). Two patients carried 43 and 50 uninterrupted CTG repeats in the

Correspondence to: A. Brice, INSERM U289, Hôpital de la Salpêtrière, 47 Bd de l'Hôpital, 75013 Paris, France  
E-mail: brice@ccr.jussieu.fr

\*These authors contributed equally to this work

*JPH3* gene. Two other patients had 44 and 46 CAA/CAG repeats in the *TBP* gene. Patients with expansions in the *TBP* or *JPH3* genes had HDL phenotypes indistinguishable from Huntington's disease. Taking into account patients with typical Huntington's disease, their frequencies were evaluated as 3% each in our series of typical HDL patients. Interestingly, incomplete penetrance of the 46 CAA/CAG repeat in the *TBP* gene was observed in a 59-year-old transmitting, but healthy, parent. Furthermore, we report a new configuration of the expanded *TBP* allele, with 11 repeats on the first polymorphic stretch of CAGs. Expansions in the *DRPLA* gene and insertions in the *PRNP* gene were not found in our group of patients. Further genetic heterogeneity of the HDL phenotype therefore exists.

**Keywords:** Huntington's disease; junctophilin-3; spinocerebellar ataxia 17; TBP; Huntington's disease-like phenotype

**Abbreviations:** ADCA = autosomal dominant cerebellar ataxia; DRPLA = dentatorubral and pallidolusian atrophy; HDL = Huntington's disease-like; IT15 = important transcript 15; JPH3 = junctophilin-3 gene; PRNP = prion protein; TBP = TATA-binding protein

## Introduction

Huntington's disease is an autosomal dominant disorder characterized by progressive movement abnormalities and impaired cognition (MIM 143100). The majority of Huntington's disease cases are caused by a CAG repeat expansion in the important transcript 15 gene (*IT15*) on chromosome 4 (Huntington's Disease Collaborative Research Group, 1993). Huntington's disease-like (HDL) phenotypes have, however, been described in which no expansions in the *IT15* gene were detected (Xiang *et al.*, 1998; Margolis *et al.*, 2001). A 192-nucleotide insertion in the region of the prion protein gene (*PRNP*) encoding an octapeptide repeat in the prion protein is responsible for *HDL1* on chromosome 20 in a single family (Moore *et al.*, 2001). In addition, a CTG repeat expansion has been identified in a few cases in the junctophilin-3 gene (*JPH3*) (*HDL2* locus) (Holmes *et al.*, 2001).

Cerebellar signs, parkinsonism, dystonia and epilepsy are part of the clinical spectrum of Huntington's disease, mostly in young-onset patients, causing clinical overlap in some cases with dentatorubral and pallidolusian atrophy (DRPLA) (Koide *et al.*, 1994; Nagafuchi *et al.*, 1994) and autosomal dominant cerebellar ataxias (ADCA) (Stevanin *et al.*, 2000; Filla *et al.*, 2002). Interestingly, several families presenting with ataxia, dementia and movement disorders, including chorea in some cases, were shown to carry abnormally expanded CAG/CAA trinucleotide repeats in one of the genes responsible for ADCA at the spinocerebellar ataxia type 17 (*SCA17*) locus, *TBP*, which encodes TATA-binding protein (TBP) (Koide *et al.*, 1999; Fujigasaki *et al.*, 2001; Zuhlke *et al.*, 2001; Silveira *et al.*, 2002).

We identified 252 index patients with an HDL phenotype who do not carry CAG repeat expansions in the *IT15* gene, 60 of whom were clinically assessed by movement disorder specialists as having 'typical' Huntington's disease; 192 other cases had been referred for genetic testing but with limited clinical data. Patients were tested for mutations in four candidate genes: *PRNP*, *JPH3*, *TBP* and *DRPLA*.

## Patients and methods

### Subjects

#### Group 1

Sixty index cases clinically diagnosed as having Huntington's disease by neurologists specializing in movement disorders and who had tested negative for the Huntington's disease mutation on chromosome 4 were selected for screening. Most of them ( $n = 49$ ) presented with dementia associated with chorea ( $n = 46$ ) and/or other movement disorders, such as dystonia ( $n = 13$ ), parkinsonism ( $n = 7$ ), myoclonus ( $n = 4$ ) and cerebellar ataxia ( $n = 15$ ). CAG repeat expansions at the *SCA1-3*, -6 and -7 loci were excluded in all patients with cerebellar ataxia. Seven patients had isolated chorea. The present series of 60 patients includes a group of 39 patients presenting with typical Huntington's disease (chorea and

dementia) from a larger series of miscellaneous cases for which CTG repeat expansions in the *JPH3* gene have been analysed previously by our group (Stevanin *et al.*, 2002).

Age at onset was  $44 \pm 22$  years (mean  $\pm$  SD), ranging from onset in childhood up to the age of 83 years. Seventeen had similarly affected first-degree relatives; no other cases were reported in the families of the remaining index patients ( $n = 43$ ). Other causes of chorea, such as acanthocytosis or the presence of anti-nuclear, anti-DNA and anti-thyroperoxidase antibodies, were excluded in the apparently sporadic cases.

Most of the patients were Caucasians of French ancestry ( $n = 46$ ). Five came from North Africa, five had Hispanic ancestry and one originated from Colombia. Three were black, from the French West Indies ( $n = 2$ ) and Africa ( $n = 1$ ). Blood samples were obtained with informed consent according to French and European law, and genomic DNA was extracted from leucocytes using standard methods.

#### Group 2

We selected 192 patients with less restrictive criteria, i.e. chorea and/or cognitive or psychiatric impairment, referred to the Laboratoire de Biochimie et Génétique Moléculaire (Hôpital Cochin, Paris) for diagnosis of the CAG repeat expansion in the *IT15* gene, but who were non-carriers and for whom details of clinical features were not fully available.

### PCR analysis for the *PRNP*, *JPH3*, *TBP* and *DRPLA* genes

CAG/CTG repeats in the *TBP*, *DRPLA* and *JPH3* genes and the octapeptide-coding region of the *PRNP* gene were amplified by PCR (polymerase chain reaction) under conditions described previously (Nagafuchi *et al.*, 1994; Koide *et al.*, 1994, 1999; Moore *et al.*, 2001; Stevanin *et al.*, 2002; Leber *et al.*, 2003). The numbers of CAG and octapeptide-coding repeats were determined by electrophoresis on an ABI-3100 automated sequencer (Applied Biosystems, Foster City, CA, USA) followed by analysis using GeneScan and Genotyper software (Applied Biosystems). The expanded repeats were sequenced using the Big-Dye Terminator kit v2™ (Applied Biosystems) and analysed with Sequencing Analysis software (Applied Biosystems).

## Results

### Screening for the *PRNP*, *JPH3*, *TBP* and *DRPLA* mutations

We identified two patients from Group 1 carrying expanded alleles in the *JPH3* gene and two others with expansions in the *TBP* gene. No patients had pathological alleles in the *DRPLA* gene. No insertions were found in the *PRNP* gene, but a deletion of one octapeptide, described as a polymorphism, was detected in two cases (Vnencak-Jones and Phillips,

**Table 1** Clinical characteristics of index patients AAR-028 and SAL-2309, with identified mutations in the *TBP* gene, and index patients FDF-571 and SAL-2289, with identified mutations in the *JPH3* genes

|                                        | Mutated gene                                   |                                                              |                                                                            |                                                     |
|----------------------------------------|------------------------------------------------|--------------------------------------------------------------|----------------------------------------------------------------------------|-----------------------------------------------------|
|                                        | <i>TBP</i>                                     |                                                              | <i>JPH3 (HDL2)</i>                                                         |                                                     |
|                                        | AAR-028                                        | SAL-2309                                                     | FDF-571                                                                    | SAL-2289                                            |
| Expansion size (trinucleotide repeats) | 46                                             | 44                                                           | 43                                                                         | 49                                                  |
| Origin                                 | France                                         | France                                                       | French West Indies                                                         | Morocco                                             |
| Family history of Huntington's disease | No. Father unaffected but carries the mutation | No. Mother died at 60 (cancer); father alive but not sampled | No. Mother demented but non-carrier; father died aged <60 (cardiac arrest) | No. Father died at 54; mother alive but not sampled |
| Sex                                    | F                                              | F                                                            | M                                                                          | F                                                   |
| Age at onset (years)                   | 23                                             | 29                                                           | 51                                                                         | 42                                                  |
| Age at examination (years)             | 30                                             | 45                                                           | 59                                                                         | 44                                                  |
| Signs at onset                         | Behavioural changes, chorea                    | Gait instability, behavioural changes                        | Behavioural changes, memory loss                                           | Chorea                                              |
| Chorea                                 | Upper limbs                                    | Diffuse                                                      | Diffuse                                                                    | Diffuse                                             |
| Dementia                               | Yes                                            | Frontal behaviour, dementia                                  | Dementia, apraxia                                                          | Frontal behaviour                                   |
| Cerebellar gait                        | Moderate                                       | Severe                                                       | Moderate                                                                   | No                                                  |
| Dysarthria                             | Moderate                                       | Moderate                                                     | Mild                                                                       | No                                                  |
| Reflexes                               | Increased (lower limbs)                        | Increased, plantar extensor                                  | Normal                                                                     | Increased                                           |
| Parkinsonism                           | Rigidity                                       | No                                                           | No                                                                         | No                                                  |
| Ophthalmoplegia                        | No                                             | No, nystagmus                                                | No                                                                         | No                                                  |
| Cerebral MRI                           | Olivopontocerebellar atrophy                   | Severe cerebellar and pontine atrophy                        | Subcortical atrophy                                                        | Caudate nucleus and cortical atrophy                |

1992). No mutations in the four analysed genes were found in patients of Group 2.

### ***Molecular and clinical features of patients with CAG/CAA repeat expansions in the TBP gene***

Patients SAL-2309 and AAR-028 carried 44 and 46 CAG/CAA repeats, respectively, in the *TBP* gene (Table 1). Direct sequence analysis in both cases revealed the following repeat structure: (CAG)<sub>3</sub> (CAA)<sub>3</sub> (CAG)<sub>9/11</sub> CAA CAG CAA (CAG)<sub>24</sub> CAA CAG. Neither patient had any affected relatives. The mother of case SAL-2309 died at age 60 years and the father was not available for testing. The father of case AAR-028 was normal on examination at age 59 years, but, interestingly, carried 38 repeats on one allele and the same 46-unit expanded repeat as his daughter on the other allele. The mother carried 38- and 39-repeat alleles.

The clinical features are summarized in Table 1. Patients SAL-2309 and AAR-028 were both of French origin. Both patients presented with a disease starting before 30 years of age, with behavioural changes and gait instability; one of the two patients also presented mild chorea at onset. Both had brisk reflexes and parkinsonism was observed in the patient with earlier onset. Interestingly, and consistent with ADCA, both had marked pontocerebellar atrophy.

### ***Molecular and clinical features of patients with CTG repeat expansions in the JPH3 gene***

Patients FDF-571 and SAL-2289 carried 43 and 50 uninterrupted CTG repeats, respectively, in the *JPH3* gene. Both patients were of African descent: FDF-571 was black and was living in the French West Indies and SAL-2289 was from southern Morocco.

The mother of FDF-571, reported to have dementia of the Alzheimer's type, did not carry an expansion in the *JPH3* gene. The father died of cardiac arrest before age 60 years, with no known history of neurological disease. Patient SAL-2289 had no family history of neurological disease and has been reported elsewhere (Stevanin *et al.*, 2002).

The phenotypes of these two patients differed (Table 1). The ages at onset may reflect the sizes of the repeats. The Moroccan patient presented with chorea and frontal behaviour, a clinical profile indistinguishable from that of classical Huntington's disease, after a disease duration of only 2 years. The 59-year-old patient from the French West Indies had clinical features compatible with Huntington's disease associated with prominent cerebellar ataxia.

### **Discussion**

We have identified four patients initially referred for Huntington's disease testing who do not carry expansions in

the *IT15* gene but have expansions in other genes: *TBP* and *JPH3*. Interestingly, these patients had no family history of the disease. Genetic heterogeneity in Huntington's disease was thought to be anecdotal since >90% of Huntington's disease patients have *IT15* CAG expansions. We showed previously, however, that *JPH3* expansions account for <3% of HDL patients, indicating further genetic heterogeneity. Interestingly, the absence of this mutation in Caucasians (Holmes *et al.*, 2001; Bauer *et al.*, 2002; Stevanin *et al.*, 2002) was confirmed in this group of patients. The phenotype was indistinguishable from Huntington's disease, as reported previously (Holmes *et al.*, 2001).

Expansions in the *TBP* gene were initially found in ADCA patients. Detailed clinical descriptions of 17 of these patients have been published (Koide *et al.*, 1999; Fujigasaki *et al.*, 2001; Nakamura *et al.*, 2001; Zuhlke *et al.*, 2001; Silveira *et al.*, 2002). All these patients had intellectual deterioration. Cerebellar ataxia, epilepsy and chorea were present in 90, 50 and 20% of the patients, respectively. The *TBP* cases presented here had prominent behavioural changes and abnormal movements at onset, including typical chorea in one case, which led to a diagnosis of Huntington's disease. This study is the first report of HDL patients carrying *TBP* gene expansions, and it highlights the clinical overlap between Huntington's disease and ADCA. According to previous reports, there is overlap between the sizes of normal (25–44 repeats) and pathological (43–63 repeats) alleles in the *TBP* gene (Koide *et al.*, 1999; Fujigasaki *et al.*, 2001; Zuhlke *et al.*, 2001; Silveira *et al.*, 2002). Interestingly, the father of one of our patients was asymptomatic at age 59 years while carrying 46 repeats in the *TBP* gene. His daughter, severely affected at age 30 years (onset at 23 years), carried a repeat of the same size. This observation illustrates the incomplete penetrance associated with small expansions in the *TBP* gene. This accounts for the lack of family history and suggests the influence of modifying genetic or environmental factors. It also shows the absence of instability, even through paternal transmission of the disease-bearing allele, which can be explained by CAA interruptions in the CAG tract. Interestingly, the first stretch of polymorphic (CAG)<sub>n</sub> reported to date in expanded *TBP* alleles carried nine repeats (Koide *et al.*, 1999; Fujigasaki *et al.*, 2001; Zuhlke *et al.*, 2001), probably because this is the most frequent number of repeats in normal alleles (Zuhlke *et al.*, 2001). We report here the first case (Patient AAR-028) carrying 11 repeats on the first polymorphic stretch of CAGs in *TBP*.

Repeat expansions in the *DRPLA* gene and insertions in the octapeptide-coding region of the *PRNP* gene were not found in our series of patients. In the case of *PRNP*, this was not surprising since the phenotype of the single HDL1 family was atypical, with chorea present in only four out of seven patients but epileptic seizures with abnormal EEG in all patients (three out of three) (Xiang *et al.*, 1998), a phenotype closer to *DRPLA*. The exclusion of CAG expansions in the *DRPLA* gene in our series of HDL patients can be explained

by the rarity of this mutation in Europeans (Leber *et al.*, 2003).

In conclusion, the *TBP*- and *JPH3*-associated phenotypes were variable but remained within the spectrum of features observed in Huntington's disease patients. It is therefore not surprising that no mutations were found in these genes in the series of patients with less restrictive criteria. In addition, mutations in the *JPH3* and *TBP* genes accounted for only 6% of typical HDL patients without *IT15*/CAG repeat expansions, suggesting further genetic heterogeneity. Given their low frequencies, these genes should be analysed in patients presenting with typical Huntington's disease who are either of African origin (*JPH3*) or present ataxia (*TBP*). Lastly, family histories may have been overlooked due to incomplete penetrance or to a censor effect, as in our four cases. It is therefore worthwhile analysing CAG/CTG repeats in both the *TBP* gene and the *JPH3* gene in typical HDL patients, regardless of their family history.

## Acknowledgements

The authors wish to thank Drs G. Fénelon, R. Sahloul and B. Singer for referring patients and Dr M. Abada-Bendib and Professors B. Dubois and Y. Agid for their clinical expertise. We also wish to thank Dr Merle Ruberg for critical reading of the manuscript and the DNA and Cell Bank of the Institut Fédératif de Neurosciences (Paris, France) for the collection and treatment of the samples. The authors received financial support from the VERUM Foundation and the Institut National de la Santé et de la Recherche Médicale. H.F. was in receipt of a fellowship from EGIDE and J.T. was supported by a fellowship from the Association Claude Bernard and the Japan Society for the Promotion of Science (JSPS).

## References

- Bauer I, Gencik M, Laccone F, Peters H, Weber BH, Feder EH, et al. Trinucleotide repeat expansions in the junctophilin-3 gene are not found in Caucasian patients with a Huntington's disease-like phenotype. *Ann Neurol* 2002; 51: 662.
- Filla A, De Michele G, Coccozza S, Patignani A, Volpe G, Castaldo I, et al. Early onset autosomal dominant dementia with ataxia, extrapyramidal features, and epilepsy. *Neurology* 2002; 58: 922–8.
- Fujigasaki H, Martin JJ, De Deyn PP, Camuzat A, Deffond D, Stevanin G, et al. CAG repeat expansion in the TATA box-binding protein gene causes autosomal dominant cerebellar ataxia. *Brain* 2001; 124: 1939–47.
- Holmes SE, O'Hearn E, Rosenblatt A, Callahan C, Huang HS, Ingersoll-Ashworth RG, et al. A repeat expansion in the gene encoding junctophilin-3 is associated with Huntington disease-like 2. *Nature Genet* 2001; 29: 377–8.
- Huntington's Disease Collaborative Research Group. A novel gene containing a trinucleotide repeat that is expanded and unstable on Huntington's disease chromosomes. *Cell* 1993; 72: 971–83.
- Koide R, Ikeuchi T, Onodera O, Tanaka H, Igarashi S, Endo K, et al.

- Unstable expansion of CAG repeat in hereditary dentatorubral-pallidolusian atrophy (DRPLA). *Nat Genet* 1994; 6: 9–13.
- Koide R, Kobayashi S, Shimohata T, Ikeuchi T, Maruyama M, Saito M, et al. A neurological disease caused by an expanded CAG trinucleotide repeat in the TATA-binding protein gene: a new polyglutamine disease? *Hum Mol Genet* 1999; 8: 2047–53.
- Leber I, Camuzat A, Castelnovo G, Azulay J-P, Genton P, Gastaut J-L, et al. Prevalence of dentatorubral-pallidolusian atrophy in a large series of Caucasian patients with cerebellar ataxia. *Arch Neurol*. In press 2003.
- Margolis RL, O'Hearn E, Rosenblatt A, Willour V, Holmes SE, Franz ML, et al. A disorder similar to Huntington's disease is associated with a novel CAG repeat expansion. *Ann Neurol* 2001; 50: 373–80.
- Moore RC, Xiang F, Monaghan J, Han D, Zhang Z, Edstrom L, et al. Huntington disease phenocopy is a familial prion disease. *Am J Hum Genet* 2001; 69: 1385–8.
- Nagafuchi S, Yanagisawa H, Sato K, Shirayama T, Ohsaki E, Bundo M, et al. Dentatorubral and pallidolusian atrophy expansion of an unstable CAG trinucleotide on chromosome 12p. *Nat Genet* 1994; 6: 14–8.
- Nakamura K, Jeong SY, Uchihara T, Anno M, Nagashima K, Nagashima T, et al. SCA17, a novel autosomal dominant cerebellar ataxia caused by an expanded polyglutamine in TATA-binding protein. *Hum Mol Genet* 2001; 10: 1441–8.
- Silveira I, Miranda C, Guimaraes L, Moreira MC, Alonso I, Mendonca P, et al. Trinucleotide repeats in 202 families with ataxia: a small expanded (CAG)<sub>n</sub> allele at the SCA17 locus. *Arch Neurol* 2002; 59: 623–9.
- Stevanin G, Durr A, Brice A. Clinical and molecular advances in autosomal dominant cerebellar ataxias: from genotype to phenotype and physiopathology. *Eur J Hum Genet* 2000; 8: 4–18.
- Stevanin G, Camuzat A, Holmes SE, Julien C, Sahloul R, Dode C, et al. CAG/CTG repeat expansions at the Huntington's disease-like 2 locus are rare in Huntington's disease patients. *Neurology* 2002; 58: 965–7.
- Vnencak-Jones CL, Phillips JA 3rd. Identification of heterogeneous PrP gene deletions in controls by detection of allele-specific heteroduplexes (DASH). *Am J Hum Genet* 1992; 50: 871–2.
- Xiang F, Almqvist EW, Huq M, Lundin A, Hayden MR, Edstrom L, et al. A Huntington disease-like neurodegenerative disorder maps to chromosome 20p. *Am J Hum Genet* 1998; 63: 1431–8.
- Zuhlke C, Hellenbroich Y, Dalski A, Kononowa N, Hagenah J, Vieregge P, et al. Different types of repeat expansion in the TATA-binding protein gene are associated with a new form of inherited ataxia. *Eur J Hum Genet* 2001; 9: 160–4.

*Received January 17, 2003. Revised January 24, 2003.  
Accepted February 24, 2003*
